# Supplementary material for: Effect of alkali metal cations on network rearrangement in polyisoprene ionomers
Source: Royal Society of Chemistry journal article supplement (doi:10.1039/d2cp01159j), 2022-01-01
Supplement: d2cp01159j1.pdf [file d2cp01159j1.pdf]

# Effect of Alkali Metal Cations on Network Rearrangement in Polyisoprene Ionomers

*Yohei Miwa,<sup>1,†,\*</sup> Koki Hasegawa,<sup>1</sup> Taro Udagawa,<sup>1</sup> Yu Shinke,<sup>2</sup> and Shoichi Kutsumizu<sup>1</sup>*

<sup>1</sup>Department of Chemistry and Biomolecular Science, Faculty of Engineering, Gifu University, Yanagido, Gifu 501-1193, Japan.

<sup>2</sup>The Yokohama Rubber Co., Ltd., Hiratsuka, 254-8601, Japan.

<sup>†</sup>PRESTO, Japan Science and Technology Agency.

\*Author to whom correspondence should be addressed.

**E-mail: [y\\_miwa@gifu-u.ac.jp](mailto:y_miwa@gifu-u.ac.jp)**

## Table of Contents

### DFT calculation

#### <Supplementary Figures>

**Fig. S1.** Optimized structure ( $C_{2v}$ ) of  $\text{Li}^+(\text{Cs}^+)\cdots\text{ethylene}$  complex.

**Fig. S2.** Potential energy curve along cation- $\pi$  distance for (a)  $\text{Li}^+\cdots\text{ethylene}$  and (b)  $\text{Cs}^+\cdots\text{ethylene}$  complexes obtained by M06/6-31G(d,p) and M06/aug-cc-pVTZ calculations.

**Fig. S3.** (A)  $^1\text{H}$ -NMR and (B)  $^{13}\text{C}$ -NMR spectra for PI used in this work.

**Fig. S4.** FT-IR bands for  $\nu(\text{C}=\text{O})$  of carboxy and  $\nu(\text{O}-\text{C}-\text{O}^-)$  of sodium carboxylate for the samples are indicated.

**Fig. S5.** FT-IR band for  $\nu(\text{O}-\text{H})$  of water in the indicates samples. This band is clearly shown in the moisture absorbed samples. On the other hands, the  $\nu(\text{O}-\text{H})$  band are completely disappeared after vacuum drying at 35 °C for 1 day. This demonstrates complete drying of these samples by this procedure.

**Fig. S6.** TG results for the indicates samples. The weight loss from the water detachment was observed for the moisture absorbed samples. The TG curves for the samples vacuum dried at 35 °C for 2 days are overlapped with each other.

**Fig. S7.** DFT calculation results for cation- $\pi$  interaction between double bond in the PI segment and  $\text{Li}^+$  and  $\text{Cs}^+$ . (A) Model segments used for the calculation. Most stable structure for each coordination in (B)  $\text{PI}-\text{Li}+n\text{PI}$  and (C)  $\text{PI}-\text{Cs}+n\text{PI}$ .

**Fig. S8.** DSC traces for second heating process of the indicated samples.

**Fig. S9.** Temperature dependence of (A) storage modulus ( $G'$ ) and (B) loss modulus ( $G''$ ) for PI-Na measured at 1 Hz. Relaxations assigned to the network rearrangement are indicated with arrows. The relaxation temperature decreases with the moisture absorption of the sample.

**Fig. S10.** Temperature dependences of saturation factor,  $S$ , for PI-Na spin-probed with 4-carboxy-TEMPO at different concentrations ( $4 \times 10^{-8} \text{ mol g}^{-1}$  and  $6 \times 10^{-8} \text{ mol g}^{-1}$ ) and for PI-Na spin-probed with 5DSA at  $6 \times 10^{-8} \text{ mol g}^{-1}$ .  $T_{g,ESR}$  of each sample is indicated with arrow. Each plot is vertically shifted to avoid overlapping.

### DFT calculation

To assess the accuracy of the calculation, we have performed some preliminary calculations. Since we mainly focused on the cation- $\pi$  interaction, simple systems,  $\text{Li}^+\cdots\text{ethylene}$  and  $\text{Cs}^+\cdots\text{ethylene}$  complexes, were chosen as the model systems for the preliminary calculation. First, geometry-optimization calculation was performed by M06/6-31G(d,p), 6-31+G(d,p), 6-311+G(d,p), and aug-cc-pVTZ methods. As shown in **Fig. S1**, the  $C_{2v}$  optimized structure was obtained. The cation- $\pi$  distance and interaction energy are listed in Table S1. The cation- $\pi$  distance is almost unchanged by adopting larger basis sets. In addition, the M06/6-31G(d,p) calculation sufficiently reproduced the interaction energy obtained by the most accurate M06/aug-cc-pVTZ calculation.

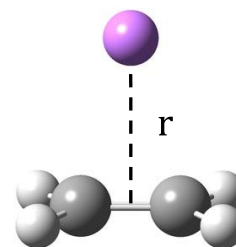

**Fig. S1.** Optimized structure ( $C_{2v}$ ) of  $\text{Li}^+(\text{Cs}^+)\cdots\text{ethylene}$  complex.

Table S1. Cation- $\pi$  distance [ $\text{\AA}$ ] and interaction energy (IE)<sup>a</sup> [kcal/mol] in  $\text{Li}^+$ -ethylene and  $\text{Cs}^+$ -ethylene complexes.

|              | $\text{Li}^+\cdots\text{ethylene}$ |                 | $\text{Cs}^+\cdots\text{ethylene}$ |                 |
|--------------|------------------------------------|-----------------|------------------------------------|-----------------|
|              | $r(\text{Li}^+-\pi)$               | IE <sup>a</sup> | $r(\text{Cs}^+-\pi)$               | IE <sup>a</sup> |
| 6-31G(d,p)   | 2.319                              | -23.0           | 3.676                              | -4.8            |
| 6-31+G(d,p)  | 2.326                              | -20.0           | 3.687                              | -3.6            |
| 6-311+G(d,p) | 2.302                              | -19.5           | 3.676                              | -5.3            |
| aug-cc-pVTZ  | 2.294                              | -20.7           | 3.636                              | -5.9            |

<sup>a</sup> IE is defined as  $\text{IE} = E(\text{cation-ethylene}) - \{E(\text{cation}) + E(\text{ethylene})\}$ .

We further checked the validity of the use of 6-31G(d,p) basis set by drawing the potential energy curve along cation- $\pi$  distance. **Fig. S2** shows the potential energy curves for cation-ethylene complexes. Clearly, the M06/6-31G(d,p) and the M06/aug-cc-pVTZ potential energy curves are similar to each other for both Li<sup>+</sup>-ethylene and Cs<sup>+</sup>-ethylene complexes.

These preliminary calculations clearly demonstrated that the M06/6-31G(d,p) method is accurate enough for analyzing cation- $\pi$  complexes.

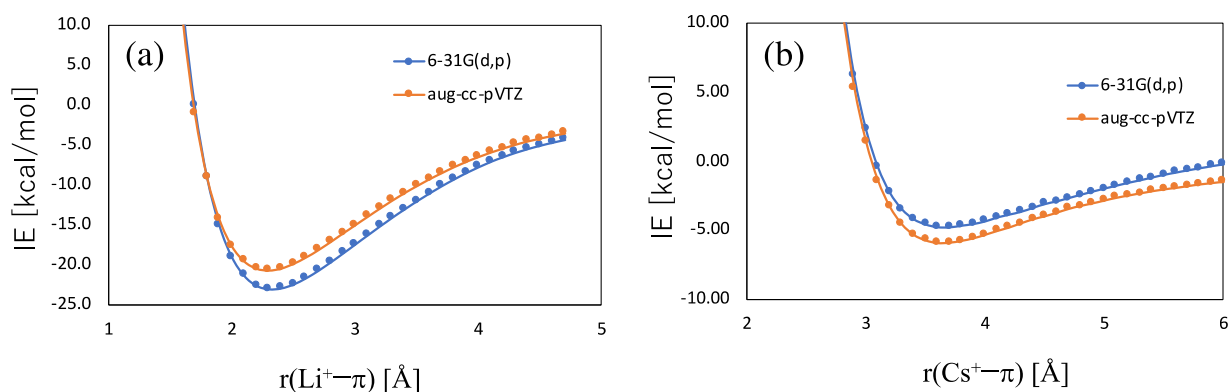

**Fig. S2.** Potential energy curve along cation- $\pi$  distance for (a) Li<sup>+</sup>...ethylene and (b) Cs<sup>+</sup>...ethylene complexes obtained by M06/6-31G(d,p) and M06/aug-cc-pVTZ calculations.

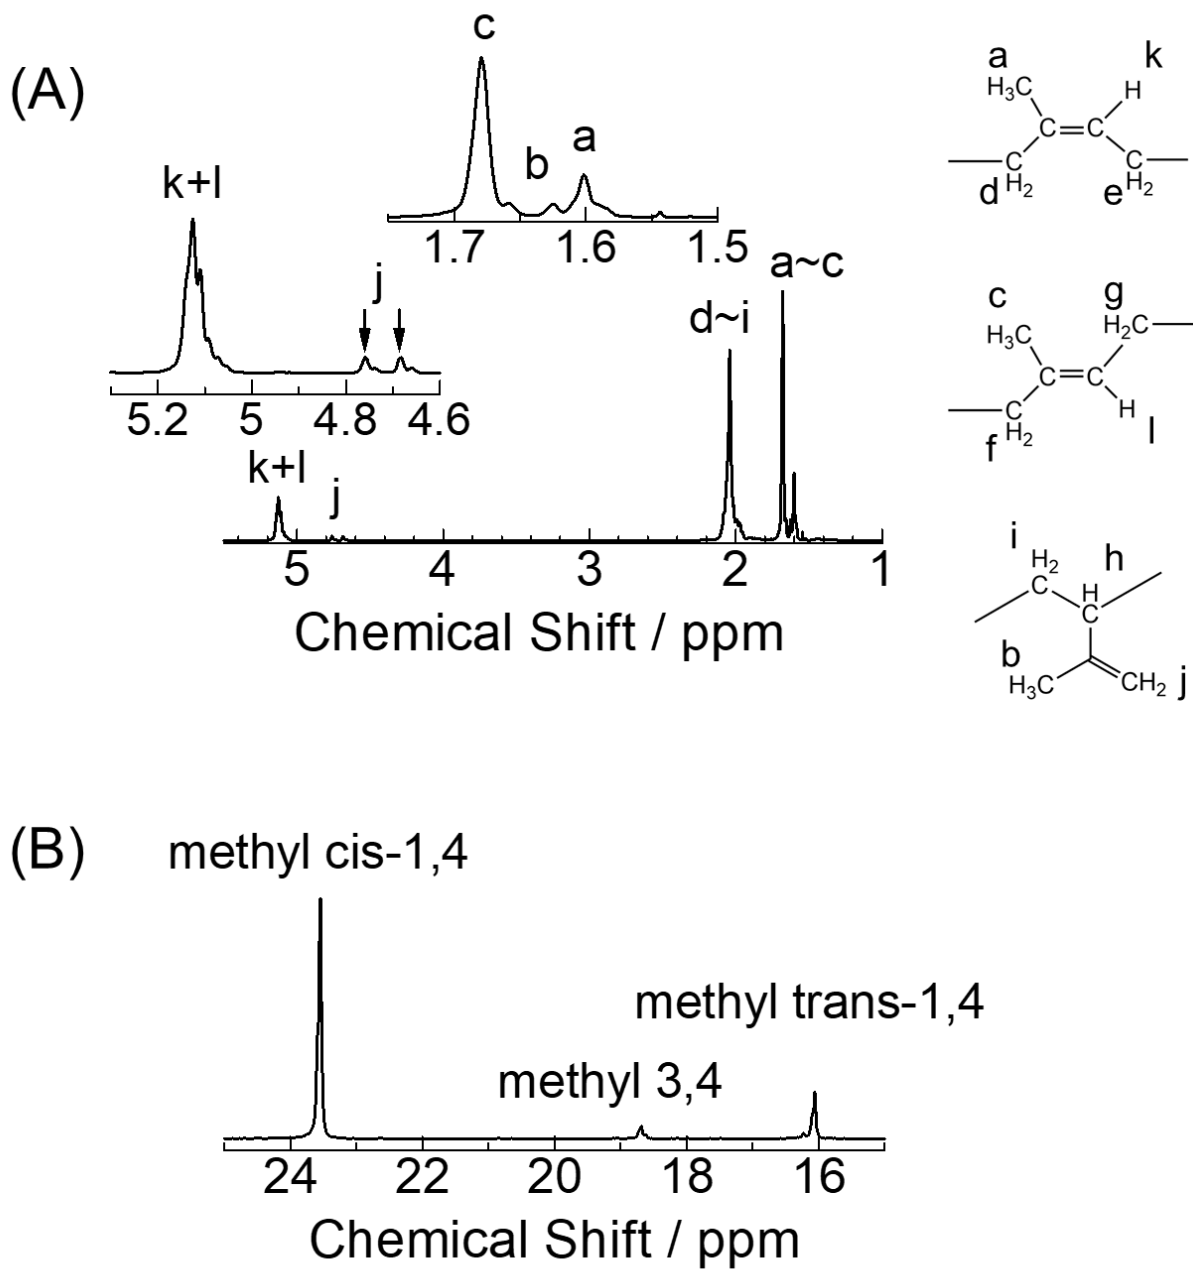

Fig. S3. (A)  $^1\text{H}$ -NMR and (B)  $^{13}\text{C}$ -NMR spectra for PI used in this work.

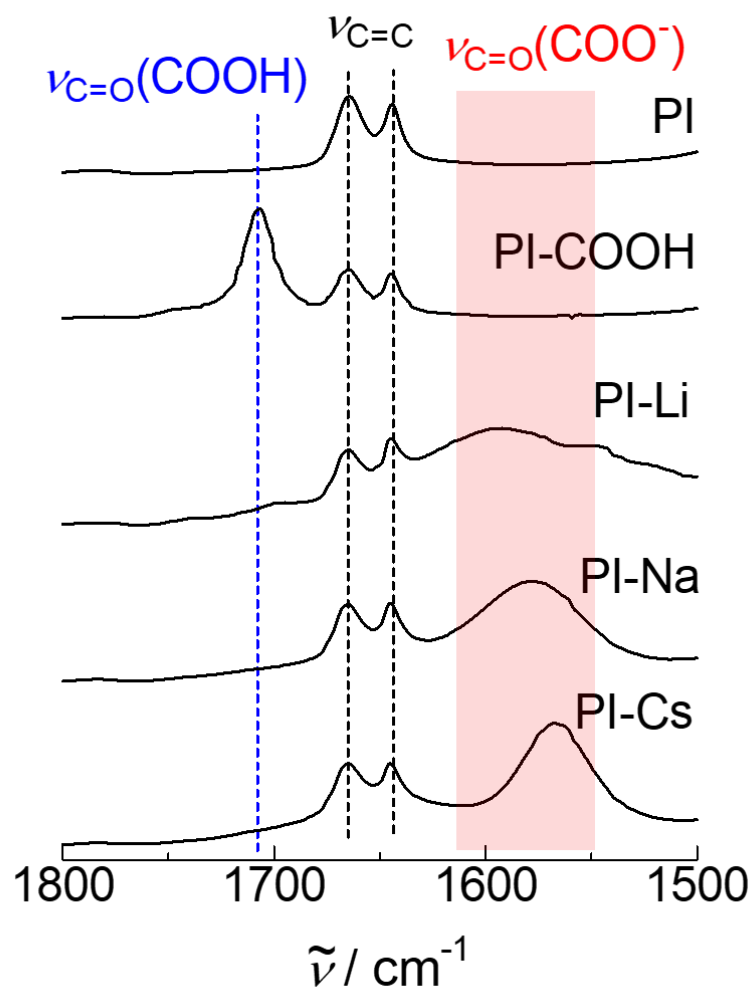

**Fig. S4.** FT-IR bands for  $\nu(\text{C=O})$  of carboxy and  $\nu(\text{O-C-O}^-)$  of sodium carboxylate for the samples are indicated.

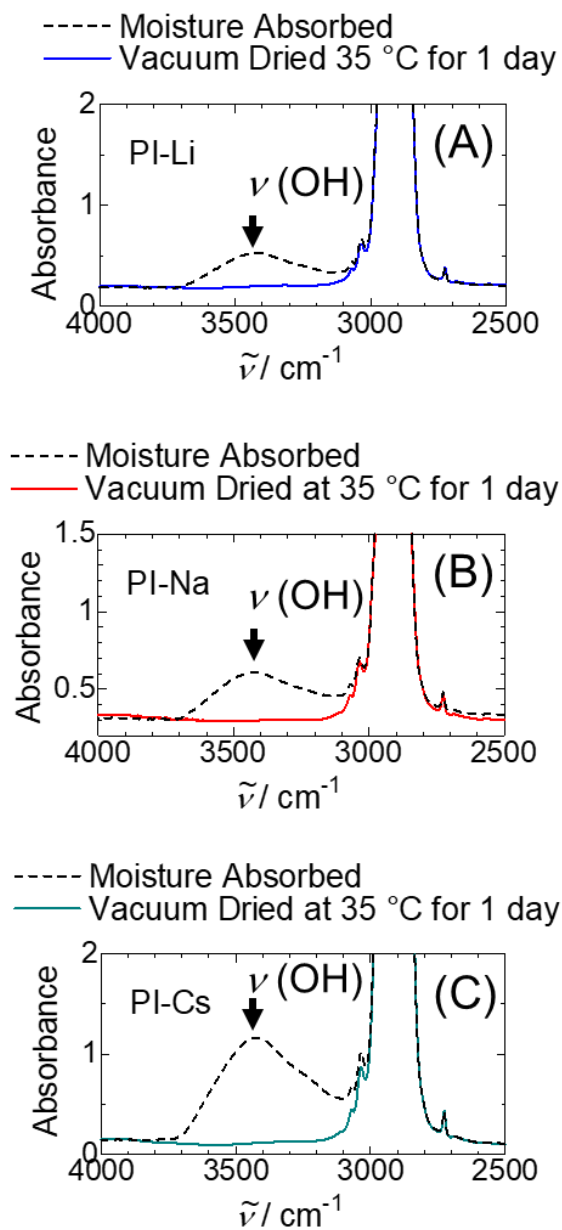

**Fig. S5.** FT-IR band for  $\nu(\text{O-H})$  of water in the indicates samples. This band is clearly shown in the moisture absorbed samples. On the other hands, the  $\nu(\text{O-H})$  band are completely disappeared after vacuum drying at 35  $^{\circ}\text{C}$  for 1 day. This demonstrates complete drying of these samples by this procedure.



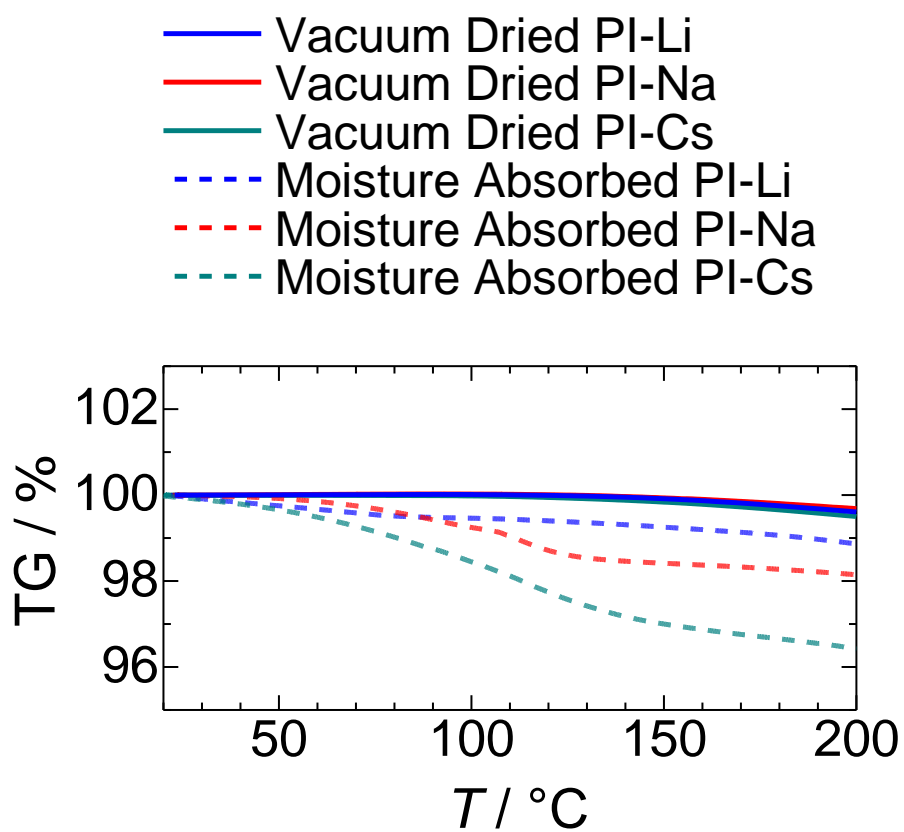

**Fig. S6.** TG results for the indicates samples. The weight loss from the water detachment was observed for the moisture absorbed samples. The TG curves for the samples vacuum dried at 35 °C for 2 days are overlapped with each other.

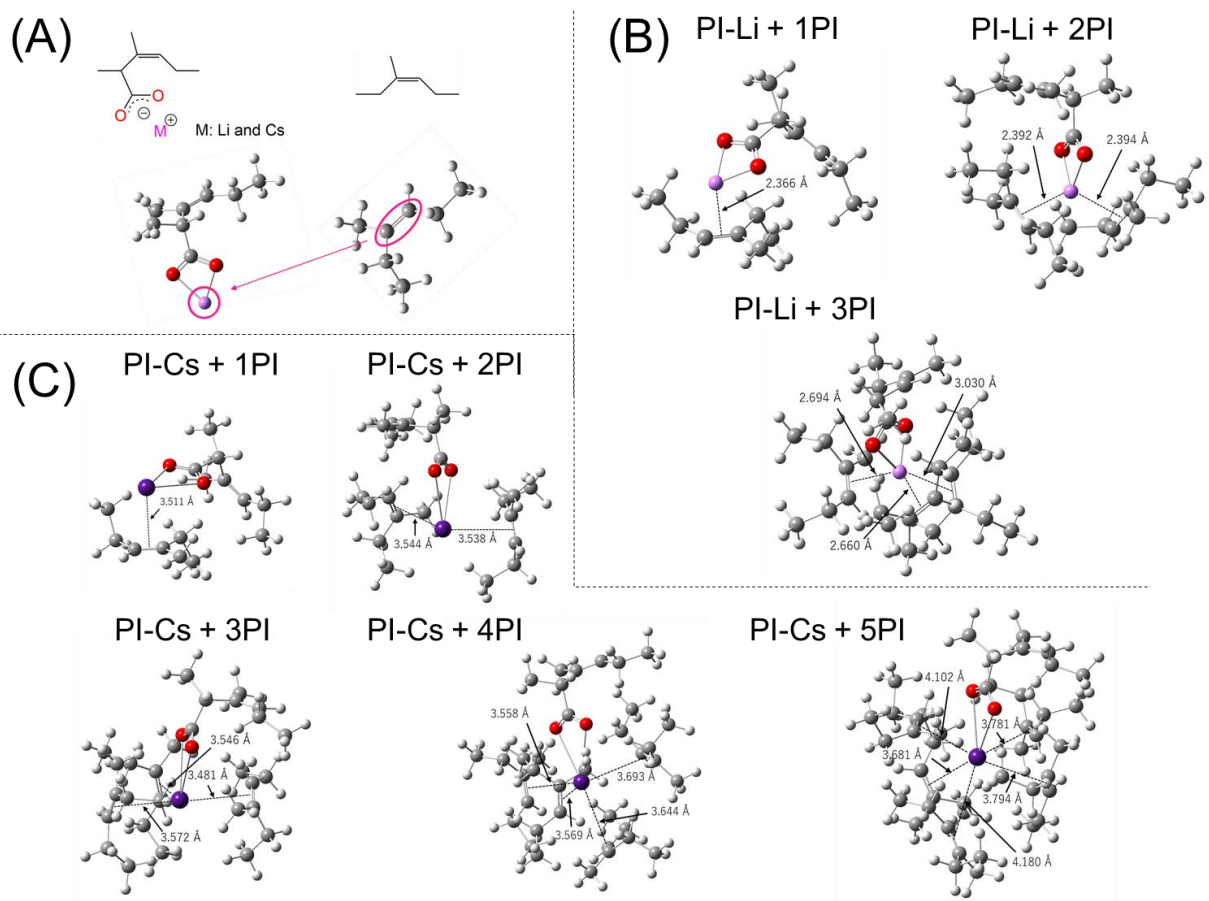

**Fig. S7.** DFT calculation results for cation- $\pi$  interaction between double bond in the PI unit and  $\text{Li}^+$  and  $\text{Cs}^+$ . (A) Model segments used for the calculation. Most stable structure for each coordination in (B)  $\text{PI-Li}+n\text{PI}$  and (C)  $\text{PI-Cs}+n\text{PI}$ .

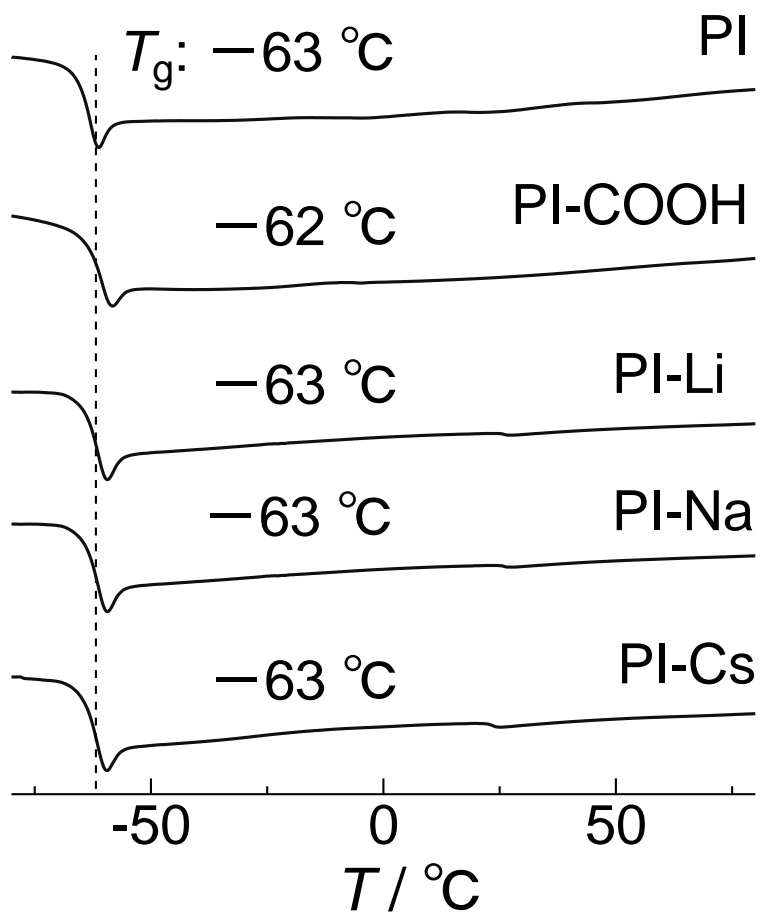

**Fig. S8.** DSC traces for second heating process of the indicated samples.

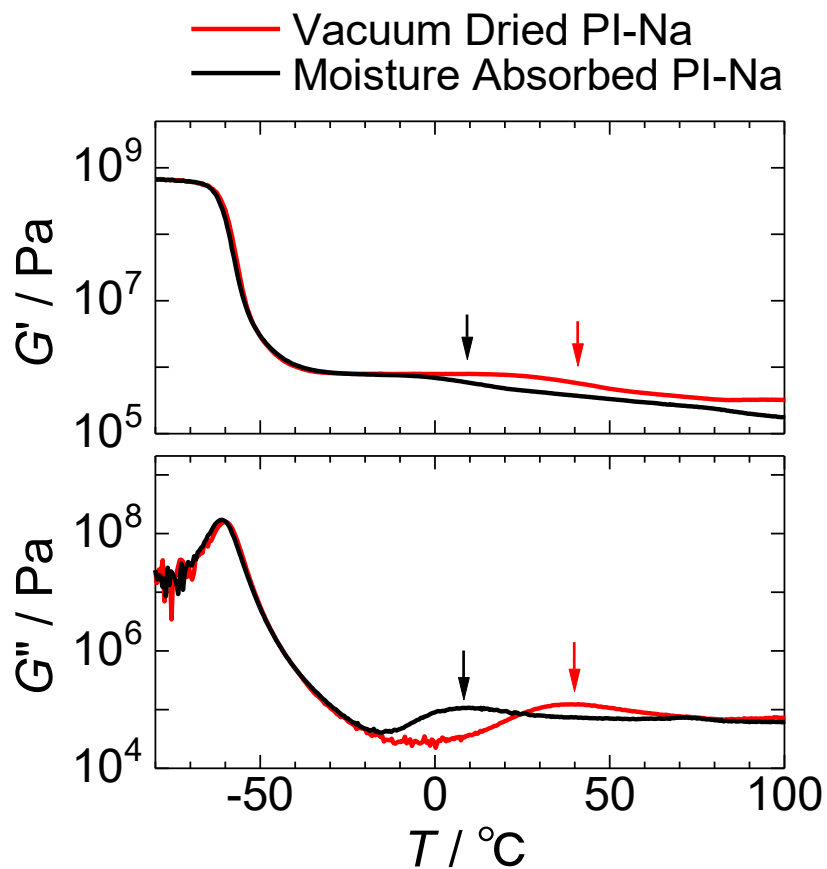

**Fig. S9.** Temperature dependence of (A) storage modulus ( $G'$ ) and (B) loss modulus ( $G''$ ) for PI-Na measured at 1 Hz. Relaxations assigned to the network rearrangement are indicated with arrows. The relaxation temperature decreases with the moisture absorption of the sample.

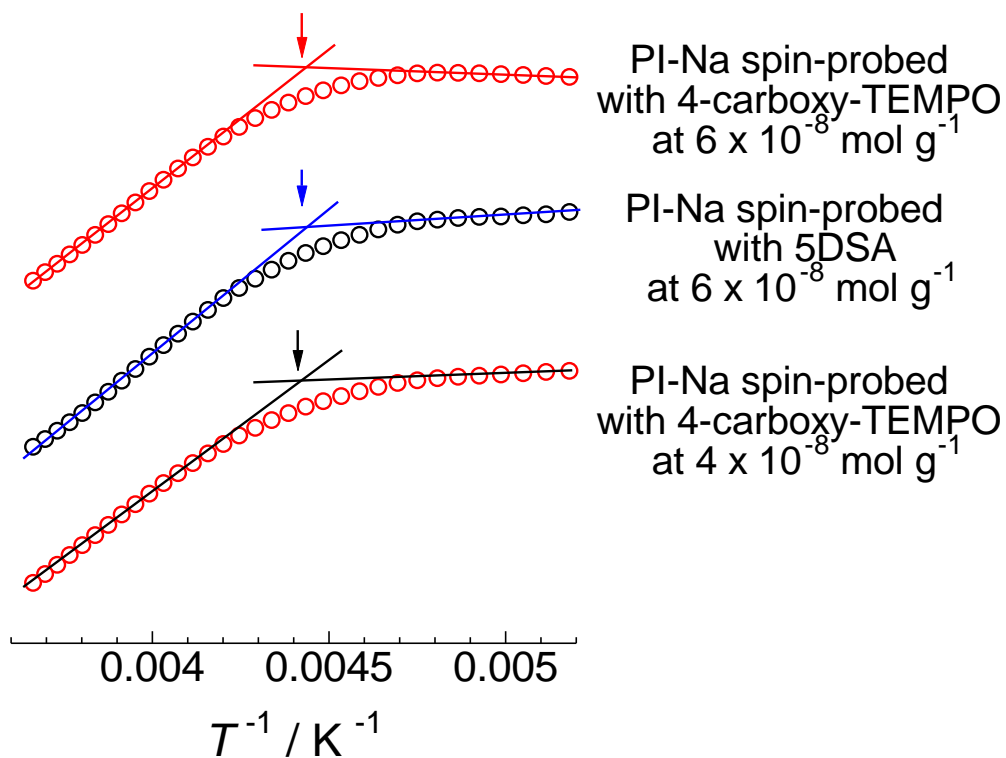

**Fig. S10.** Temperature dependences of saturation factor,  $S$ , for PI-Na spin-probed with 4-carboxy-TEMPO at different concentrations ( $4 \times 10^{-8} \text{ mol g}^{-1}$  and  $6 \times 10^{-8} \text{ mol g}^{-1}$ ) and for PI-Na spin-probed with 5DSA at  $6 \times 10^{-8} \text{ mol g}^{-1}$ .  $T_{g,\text{ESR}}$  of each sample is indicated with arrow. Each plot is vertically shifted to avoid overlapping.
